# Supplementary material
Source: PubMed Central journal article supplement (PMC3357142)
Supplement: jin-0004-0248-s02.pdf [file jin-0004-0248-s02.pdf]

**Supplemental Table 1. Primer List**

| <b>Sense Primer</b> | <b>Sequence</b>                  | <b>Antisense Primer</b> | <b>Sequence</b>                 | <b>Product Size (bp)</b> |
|---------------------|----------------------------------|-------------------------|---------------------------------|--------------------------|
| CBD1 (2)s           | 5'-TGAGGCCTCTCTACTTGCTGCTGC-3'   | CBD1 (118)a             | 5'-TCCTGGCACAGATGTACTGGTCAGA-3' | 117                      |
| CBD102 (-2)s        | 5'-CCATGAAGATCCATTGTCTCTTCTT-3'  | CBD102 (140)a           | 5'-CGGTTATGAGGGCATCTGAATG-3'    | 142                      |
| CBD103 (12)s        | 5'-TTACCTTCTCCTCCTGTTGCCCTTG-3'  | CBD103 (117)a           | 5'-CCGACCGCTCCTTATTCTGCAAT-3'   | 106                      |
| CBD104 (31)s        | 5'-TTCTTCCTTCTGGCCCCAGTGACAAG-3' | CBD104 (145)a           | 5'-GGCATAATCCAATGCTGGATTCTC-3'  | 115                      |
| CBD105 (2)s         | 5'-TGATCCTGAGCAGAAAGATGTCTTG-3'  | CBD105 (178)a           | 5'-CAACCTTCTCATCTCGGTGCATAT-3'  | 177                      |
| CBD106 (5)s         | 5'-GGACGTTCCCTCTTCTTTTTGCTG-3'   | CBD106 (147)a           | 5'-ATTCTGGCAGAGAGCCACCAGTTC-3'  | 143                      |
| CBD107 (48)s        | 5'-TCTCCTTGCTCACATTTTCTCAGC-3'   | CBD107 (164)a           | 5'-CAGCCCCCAATCTTATCTTCAAAG-3'  | 117                      |
| CBD108 (23)s        | 5'-TCGCCCTGCTCTTCTTTCTGAG-3'     | CBD108 (126)a           | 5'-CGTTTCCAGGCAAAACTCCTG-3'     | 104                      |
| CBD109 (6)s         | 5'-GCTCCATGTGCTTTTCTTCATGC-3'    | CBD109 (121)a           | 5'-TGTCTCTTCTGCAAACGCCAG-3'     | 116                      |
| CBD110 (30)s        | 5'-GCTCTTTTGGGTCACAATTTTACC-3'   | CBD110 (180)a           | 5'GCACTGATTTCTCCATTTAATGCAG-3'  | 151                      |
| CBD111 (36)s        | 5'-TTGGGTCACAATTTTACCAGCC-3'     | CBD111 (140)a           | 5'-TGGCACTCAAGTCTACATCGGC-3'    | 105                      |
| CBD112 (95)s        | 5'-GCACACACACAAAAACAATCCAG-3'    | CBD112 (237)a           | 5'-TGTAGGTCTTCCACAGTATGCCATC-3' | 143                      |
| CBD113 (30)s        | 5'-TGTTCTCACTGTGTCTTGTGGTCC-3'   | CBD113 (213)a           | 5'-GACTGGCTTTTGGTATCCCG-3'      | 184                      |
| CBD114 (36)s        | 5'-TTATGTGACTTTCATCCTACCAGCC-3'  | CBD114 (136)a           | 5'-TTTCACTCTAAAGCAGCGTCTTC-3'   | 101                      |
| CBD116 (27)s        | 5'-GACAATCTCCTTCTTCTGATCCTG-3'   | CBD116 (270)a           | 5'-CAAGTTGGAATTGGGGTCATAATC-3'  | 244                      |
| CBD117 (11)s        | 5'-CTTGCTGGATCATAAAAGGACACTG-3'  | CBD117 (143)a           | 5'-GCTTGGGTTAGTCTGTGTGGTTGAG-3' | 133                      |
| CBD118 (3)s         | 5'-GAGACTCCTGTTCTGACTTTTGC-3'    | CBD118 (257)a           | 5'-GGTGTGGTGAGACTTGTACCATTG-3'  | 255                      |
| CBD119 (12)s        | 5'-CCTCTTTTTTGTATCCTTCTGGC-3'    | CBD119 (133)a           | 5'-GGTAGGGCTGTTCACTCTTTCTGC-3'  | 122                      |
| CBD120 (12)s        | 5'-CCTCTTTTTTGTATCCTTCTGGC-3'    | CBD120 (142)a           | 5'-AGCACCGTTTACGATTTTCGC-3'     | 131                      |
| CBD122 (8)s         | 5'-CTTTTTTGTGACTTTGGCTGC-3'      | CBD122 (181)a           | 5'-TTGGCTGGAAGTTGGGCTTC-3'      | 174                      |
| CBD123 (1)s         | 5'-ATGAAGCTCCTTTGGCTGACTG-3'     | CBD123 (188)a           | 5'-TTTTCTCTCGGCTGGAAGTTGGGC-3'  | 188                      |
| CBD124 (8)s         | 5'-GCTGCTTCTGCTCATTGTGGC-3'      | CBD124 (182)a           | 5'-CCTGCTTCCATAGGGGAGACAG-3'    | 175                      |
| CBD125 (62)s        | 5'-GCTGGGAAACTGAAAGATGTTGG-3'    | CBD125 (212)a           | 5'-CGTGGTGGCATTTTTGTGTATCC-3'   | 151                      |
| CBD126 (155)s       | 5'-GCCCAAAGAAAAAATGTGCTG-3'      | CBD126 (398)a           | 5'-AAGAGATGCGATGCCCTTCC-3'      | 244                      |
| CBD127 (21)s        | 5'-TGCAATCCTGCTGTTCCAGAAG-3'     | CBD127 (179)a           | 5'-AATTCCACGATGTTGAGGCAAC-3'    | 159                      |
| CBD128 (97)s        | 5'-CGGAAGAAATGTAATAATGGGGG-3'    | CBD128 (226)a           | 5'-TAGGCTGTGGTAAAGGGAGAGGTG-3'  | 130                      |
| CBD129 (87)s        | 5'-GGGTTTTGGAAGATGCAGAGACC-3'    | CBD129 (251)a           | 5'-ATTGGTAGTTGTTCTTGGGAGCC-3'   | 165                      |
| CBD130 (88)s        | 5'-CAGTGTGTTCTTTTGAAGGGGG-3'     | CBD130 (234)a           | 5'-AGATTTTGCTTTGGGAGCCG-3'      | 147                      |
| CBD131 (2)s         | 5'-TGAGGGTCTTGTATTCCATCCTTG-3'   | CBD131 (129)a           | 5'-GTCGAGATTGCACTTCATTCTGC-3'   | 128                      |
| CBD132 (150)s       | 5'-CCGACTGTGTTGTATGAAAAACCC-3'   | CBD132 (272)a           | 5'-GGAGTTGAAGCCATTTGTTGCTC-3'   | 123                      |
| CBD134 (51)s        | 5'-GCTGGCAGTTTGAATCCACTG-3'      | CBD134 (192)a           | 5'-CGGGTTTCTTTGATACAGCAC-3'     | 142                      |
| CBD135 (25)s        | 5'-GTGGTCCTTGTGTTACTCTCCTGTG-3'  | CBD135 (148)a           | 5'-CACTTTTCCCACATGATTTCTTGC-3'  | 124                      |
| CBD136 (8)s         | 5'-TCTGTATTTCTGGGTTGCTTTCC-3'    | CBD136 (226)a           | 5'-AAGGCTCTTTGACCTGGGGTGG-3'    | 219                      |
| CBD138 (71)s        | 5'-GGCGGAAATCTCTTGAATGTGAG-3'    | CBD138 (130)a           | 5'-CATGGGTCTTTTGGTGCTTACAG-3'   | 60                       |
| CBD139 (12)s        | 5'-CTCCCTTCTCATTTTCGTTGTCC-3'    | CBD139 (122)a           | 5'-TTCCTTCTCAGGCATACGCTTG-3'    | 111                      |

**Supplemental Table 1. Primer List (Continued)**

| <b>Sense Primer</b>                | <b>Sequence</b>                         | <b>Antisense Primer</b> | <b>Sequence</b>                 | <b>Product Size (bp)</b> |
|------------------------------------|-----------------------------------------|-------------------------|---------------------------------|--------------------------|
| CBD140 (4)s                        | 5'-AGACTCCTCCATGTGGTCCTCAC-3'           | CBD140 (123)a           | 5'-TCGCTTCAGGCAGTTTCCGC-3'      | 120                      |
| CBD141 (33)s                       | 5'-TTTCCTCCTGATTCACTTGGTCTC-3'          | CBD141 (186)a           | 5'-AGCCAGAACACAGCACACCTTG-3'    | 154                      |
| CBD142 (47)s                       | 5'-ACCAAGGCTATGGAGTATGCAGAG-3'          | CBD142 (147)a           | 5'-GGTTGAATCTGAGTTAATGCAGCAC-3' | 101                      |
| SPAG11c (80)s                      | 5'-TTAACCACCAAGGTACAGGGTC-3'            | SPAG11c (184)a          | 5'-AGAGGCGACGTTTTTCTCGG-3'      | 105                      |
| SPAG11e (7)s                       | 5'-GCCCTCTTCTTTTGGCCGTC-3'              | SPAG11e (156)a          | 5'-GCAGATTTAGCCTTTCTCTCACC-3'   | 150                      |
| RPS5 (54)s                         | 5'-GCTCTTTGGGAAATGGAGCAC-3'             | RPS5 (235)a             | 5'-GCATCATCATTGAGTTGGTCAGG-3'   | 182                      |
| <b>qRT-PCR Primers</b>             |                                         |                         |                                 |                          |
| CBD1 (2)s                          | 5'-TGAGGCCTCTCTACTTGCTGCTGC-3'          | CBD1 (118)a             | 5'-TCCTGGCACAGATGTACTGGTCAGA-3' | 117                      |
| CBD103 (12)s                       | 5'-TTACCTTCTCCTCCTGTTGCCCTTG-3'         | CBD103 (112)a           | 5'-CCGACCGCTCCTTATTCTGCAAT-3'   | 101                      |
| CBD108 (23)s                       | 5'-TCGCCCTGCTCTTCTTTCTGAG-3'            | CBD108 (126)a           | 5'-CGTTTCCAGGCAAACTCCTG-3'      | 104                      |
| RPS5 (54)s                         | 5'-GCTCTTTGGGAAATGGAGCAC-3'             | RPS5 (235)a             | 5'-GCATCATCATTGAGTTGGTCAGG-3'   | 182                      |
| S100A8 (28s)                       | 5'-AACCTGGTGGGGCAGATCCTTG-3'            | S100A8 (229)s           | 5'-CAACTCTTGAACCAGGTGTCTG-3'    | 202                      |
| <b>dG23 Genetics</b>               |                                         |                         |                                 |                          |
| CBD103 (1662)s                     | 5'-(6FAM) TCGGACCAAAGCCTTCCTAAAG-3'     | CBD103 (1889)a          | 5'-AACGCTCCCATCCCATTTCTGG-3'    | 228                      |
| <b>GCN</b>                         |                                         |                         |                                 |                          |
| CBD103 CN (421)s                   | 5'-TGTACCTATGGCTGTGTGTCCTGC-3'          | CBD103 CN (580)a        | 5'-CCATCTTACCTGGAACAGGCATC-3'   | 160                      |
| CTBP CN (17889)s                   | 5'-TCCACCCAAGTGTCCCTTTGTCAG-3'          | CTBP CN (17999)a        | 5'CAGCAGCCTCATTTTCCAGTTCAG-3'   | 111                      |
| <b>Recombinant Peptide Primers</b> |                                         |                         |                                 |                          |
| CBD103 F                           | 5'-GCGAATTCATGGGAATTATAAATACCCTGCAG-3'  |                         |                                 |                          |
| CBD103dG23 F                       | 5'-GCGAATTCATGATTATAAATACCCTGCAGAGG-3'  |                         |                                 |                          |
| CBD103 Both R                      | 5'-GCGTTCGACTTATTATTTCTTTCTTCGGCAGCA-3' |                         |                                 |                          |
| hBD3 F                             | 5'-CGCGAATTCATGATCATAAACACATTACAG-3'    |                         |                                 |                          |
| hBD3dG23 F                         | 5'-GCGAATTCATGATCATAAACACATTACAGAAA-3'  |                         |                                 |                          |
| hBD3 Both R                        | 5'-GCGCGTTCGACTCATTCTTTCTTCGGCAGC-3'    |                         |                                 |                          |
| <b>Bacterial Primers</b>           |                                         |                         |                                 |                          |
| Bac16s (27)s                       | 5'-AGAGTTTGATCCTGGCTCAG-3'              | Bac16s (1391)a          | 5'-GACGGGCRGTGWGTRC-3'          | Range                    |
